# Supplementary material for: K2.64Cs0.36SiF7: a new fluorosilicate with atrans-perovskite structure
Source: Royal Society of Chemistry journal article supplement (doi:10.1039/c9nj06037e), 2020-01-01
Supplement: c9nj06037e1.pdf [file c9nj06037e1.pdf]

**$K_{2.64}Cs_{0.36}SiF_7$ : A New Fluorosilicate with a Trans-perovskite Structure**

Shuzhao Huang,<sup>a</sup> Le Gao,<sup>b</sup> Feng Yu<sup>\*a</sup>

<sup>a</sup> *Key Laboratory for Green Processing of Chemical Engineering of Xinjiang Bingtuan, School of Chemistry and Chemical Engineering, Shihezi University, Shihezi 832003, P. R. China*

<sup>b</sup> *School of Physics Science and Technology, Xinjiang University, Urumqi, Xinjiang 830046, P. R. China.*

*To whom correspondence should be addressed:*

*E-mail: yufeng05@mail.ipc.ac.cn (Feng Yu)*

**Table S1.** Crystal data and structure refinement for  $\text{K}_{2.64}\text{Cs}_{0.36}\text{SiF}_7$ .

**Table S2.** Atomic coordinates and equivalent isotropic displacement parameters for  $\text{K}_{2.64}\text{Cs}_{0.36}\text{SiF}_7$ .

**Table S3.** Bond lengths [ $\text{\AA}$ ] and angles [deg] for  $\text{K}_{2.64}\text{Cs}_{0.36}\text{SiF}_7$ .

**Table S4.** The compounds in  $\text{M}_3\text{SiF}_7$  system in ICSD

**Fig.S1** The structural information of the  $[\text{SiF}_6]^{2-}$  octahedra.

**Fig.S2** The  $\text{FM}_6$  octahedra of  $\text{M}_3\text{SiF}_7$  ( $\text{M} = \text{K}^+, \text{Rb}^+, \text{Cs}^+, \text{NH}_4^+$ )

**Fig.S3** Band structure and calculated band gap of  $\text{K}_3\text{SiF}_7$ ,  $\text{Cs}_3\text{SiF}_7$  and  $\text{K}_{2.64}\text{Cs}_{0.36}\text{SiF}_7$ .

**Fig.S4** Calculated birefringence of  $\text{K}_3\text{SiF}_7$  and  $\text{Cs}_3\text{SiF}_7$ .

**Table S1.** Crystal data and structure refinement for  $K_{2.64}Cs_{0.36}SiF_7$ .

|                                                             |                                                          |
|-------------------------------------------------------------|----------------------------------------------------------|
| Empirical formula                                           | $K_{2.64}Cs_{0.36}SiF_7$                                 |
| Formula weight                                              | 312.16                                                   |
| Wavelength                                                  | 0.71073 Å                                                |
| Crystal system, space group                                 | Tetragonal, $P4/mbm$                                     |
| Unit cell dimensions                                        | $a = 7.768(4)$ Å<br>$b = 7.768(4)$ Å<br>$c = 5.560(6)$ Å |
| $Z$                                                         | 2                                                        |
| Volume                                                      | 335.5(5) Å <sup>3</sup>                                  |
| Calculated density                                          | 3.090 Mg/m <sup>3</sup>                                  |
| Absorption coefficient                                      | 3.979 mm <sup>-1</sup>                                   |
| $F(000)$                                                    | 294                                                      |
| Theta range for data collection                             | 3.66 to 27.51 °                                          |
| Limiting indices                                            | $-6 \leq h \leq 9, -10 \leq k \leq 8, -7 \leq l \leq 7$  |
| Reflections collected / unique                              | 1808 / 236 [ $R(\text{int}) = 0.0819$ ]                  |
| Completeness to theta = 27.51°                              | 99.2 %                                                   |
| Max. and min. transmission                                  | 0.7456 and 0.6307                                        |
| Refinement method                                           | Full-matrix least-squares on $F^2$                       |
| Data / restraints / parameters                              | 236 / 0 / 23                                             |
| Goodness-of-fit on $F^2$                                    | 1.086                                                    |
| Final $R$ indices [ $F_o^2 > 2\sigma(F_o^2)$ ] <sup>a</sup> | $R_1 = 0.0448, wR_2 = 0.1016$                            |
| $R$ indices (all data) <sup>a</sup>                         | $R_1 = 0.0571, wR_2 = 0.1068$                            |
| Extinction coefficient                                      | 0.019(7)                                                 |
| Largest diff. peak and hole                                 | 0.638 and -0.768 e•Å <sup>-3</sup>                       |

<sup>a</sup>  $R_1 = \Sigma||F_o| - |F_c|| / \Sigma|F_o|$  and  $wR_2 = [\Sigma w(F_o^2 - F_c^2)^2 / \Sigma wF_o^4]^{1/2}$  for  $F_o^2 > 2\sigma(F_o^2)$

**Table S2.** Atomic coordinates ( $\times 10^4$ ) and equivalent isotropic displacement parameters ( $\text{\AA}^2 \times 10^3$ ) for  $\text{K}_{2.64}\text{Cs}_{0.36}\text{SiF}_7$ .  $U(\text{eq})$  is defined as one-third of the trace of the orthogonalized  $U_{ij}$  tensor.

| Atom       | x        | y       | z       | U(eq) |
|------------|----------|---------|---------|-------|
| K(1)/Cs(1) | 10000    | 0       | 5000    | 26(1) |
| K(2)       | 12999(2) | 2001(2) | 0       | 23(1) |
| Si(1)      | 5000     | 0       | 5000    | 16(1) |
| F(1)       | 3503(6)  | 1497(6) | 5000    | 58(2) |
| F(2)       | 10000    | 0       | 0       | 36(2) |
| F(3)       | 6060(3)  | 1060(3) | 2837(7) | 43(1) |

**Table S3.** Bond lengths [Å] and angles [deg] for  $K_{2.64}Cs_{0.36}SiF_7$ .

|                          |           |                          |            |
|--------------------------|-----------|--------------------------|------------|
| K(1)/Cs(1)-F(3)#1        | 3.390(3)  | K(2)-F(3)#12             | 2.945(3)   |
| K(1)/Cs(1)-F(3)#2        | 3.390(3)  | K(2)-F(3)#10             | 2.945(3)   |
| K(1)/Cs(1)-F(3)#3        | 3.390(3)  | K(2)-F(3)#13             | 2.945(3)   |
| K(1)/Cs(1)-F(3)#4        | 3.390(3)  | K(2)-F(3)#14             | 2.945(3)   |
| K(1)/Cs(1)-F(3)          | 3.390(3)  | K(2)-F(3)#5              | 2.651(4)   |
| K(1)/Cs(1)-F(3)#5        | 3.390(3)  | K(2)-F(3)#15             | 2.651(4)   |
| K(1)/Cs(1)-F(3)#6        | 3.390(3)  | K(2)-F(2)#16             | 2.8008(16) |
| K(1)/Cs(1)-F(3)#7        | 3.390(3)  | K(2)-F(2)                | 2.8008(16) |
| K(1)/Cs(1)-F(2)#6        | 2.780(3)  | K(2)-F(1)#11             | 2.835(3)   |
| K(1)/Cs(1)-F(2)          | 2.780(3)  | K(2)-F(1)#10             | 2.835(3)   |
| K(1)/Cs(1)-F(1)#7        | 2.959(3)  | Si(1)-F(3)#9             | 1.674(4)   |
| K(1)/Cs(1)-F(1)#8        | 2.959(3)  | Si(1)-F(3)#20            | 1.674(4)   |
| K(1)/Cs(1)-F(1)#9        | 2.959(3)  | Si(1)-F(3)#21            | 1.674(4)   |
| K(1)/Cs(1)-F(1)#10       | 2.959(3)  | Si(1)-F(3)               | 1.674(4)   |
| F(2)#6-K(1)/Cs(1)-F(3)#4 | 69.23(6)  | Si(1)-F(1)#9             | 1.645(6)   |
| F(2)-K(1)/Cs(1)-F(3)#2   | 110.77(6) | Si(1)-F(1)               | 1.645(6)   |
| F(2)-K(1)/Cs(1)-F(3)#5   | 69.23(6)  | F(3)#3-K(1)/Cs(1)-F(3)#5 | 97.23(4)   |
| F(2)-K(1)/Cs(1)-F(3)#4   | 110.77(6) | F(3)#1-K(1)/Cs(1)-F(3)#2 | 41.55(13)  |
| F(2)-K(1)/Cs(1)-F(3)#1   | 69.23(6)  | F(3)#1-K(1)/Cs(1)-F(3)#5 | 138.45(13) |
| F(2)#6-K(1)/Cs(1)-F(3)   | 110.77(6) | F(3)#1-K(1)/Cs(1)-F(3)#4 | 180.00(13) |
| F(2)#6-K(1)/Cs(1)-F(3)#2 | 69.23(6)  | F(3)-K(1)/Cs(1)-F(3)#2   | 97.23(4)   |
| F(2)-K(1)/Cs(1)-F(3)     | 69.23(6)  | F(3)-K(1)/Cs(1)-F(3)#5   | 82.77(4)   |
| F(2)#6-K(1)/Cs(1)-F(3)#1 | 110.77(6) | F(3)#2-K(1)/Cs(1)-F(3)#5 | 180.00(4)  |
| F(2)#6-K(1)/Cs(1)-F(3)#3 | 69.23(6)  | F(3)#4-K(1)/Cs(1)-F(3)   | 97.23(4)   |
| F(2)#6-K(1)/Cs(1)-F(3)#5 | 110.77(6) | F(3)#4-K(1)/Cs(1)-F(3)#2 | 138.45(13) |
| F(2)-K(1)/Cs(1)-F(3)#3   | 110.77(6) | F(3)#1-K(1)/Cs(1)-F(3)#3 | 97.23(4)   |
| F(2)#6-K(1)/Cs(1)-F(2)   | 180       | F(3)#3-K(1)/Cs(1)-F(3)#2 | 82.77(4)   |
| F(3)#5-K(2)-F(3)#14      | 156.71(7) | F(3)#4-K(1)/Cs(1)-F(3)#3 | 82.77(4)   |

|                      |            |                           |            |
|----------------------|------------|---------------------------|------------|
| F(3)#10-K(2)-F(3)#13 | 46.56(14)  | F(3)#4-K(1)/Cs(1)-F(3)#5  | 41.55(13)  |
| F(3)#13-K(2)-F(3)#12 | 83.47(13)  | F(3)-K(1)/Cs(1)-F(3)#3    | 180        |
| F(3)#15-K(2)-F(3)#14 | 106.33(14) | F(3)#1-K(1)/Cs(1)-F(3)    | 82.77(4)   |
| F(3)#14-K(2)-F(3)#12 | 46.56(14)  | F(2)-K(1)/Cs(1)-F(1)#9    | 90         |
| F(3)#5-K(2)-F(3)#10  | 106.33(14) | F(2)#6-K(1)/Cs(1)-F(1)#7  | 90         |
| F(3)#14-K(2)-F(3)#13 | 64.77(15)  | F(2)#6-K(1)/Cs(1)-F(1)#9  | 90         |
| F(3)#15-K(2)-F(3)#10 | 156.71(7)  | F(2)#6-K(1)/Cs(1)-F(1)#8  | 90         |
| F(3)#5-K(2)-F(3)#12  | 156.71(7)  | F(2)-K(1)/Cs(1)-F(1)#7    | 90         |
| F(3)#14-K(2)-F(3)#10 | 83.47(13)  | F(2)-K(1)/Cs(1)-F(1)#8    | 90         |
| F(3)#10-K(2)-F(3)#12 | 64.77(15)  | F(2)#6-K(1)/Cs(1)-F(1)#10 | 90         |
| F(3)#5-K(2)-F(3)#13  | 106.33(14) | F(2)-K(1)/Cs(1)-F(1)#10   | 90         |
| F(3)#5-K(2)-F(3)#15  | 73.02(19)  | F(1)#10-K(1)/Cs(1)-F(3)   | 137.29(11) |
| F(3)#15-K(2)-F(3)#13 | 156.71(7)  | F(1)#7-K(1)/Cs(1)-F(3)#5  | 42.71(11)  |
| F(3)#15-K(2)-F(3)#12 | 106.33(14) | F(1)#7-K(1)/Cs(1)-F(3)#3  | 125.32(11) |
| F(3)#5-K(2)-F(2)     | 80.94(4)   | F(1)#7-K(1)/Cs(1)-F(3)    | 54.68(11)  |
| F(3)#5-K(2)-F(2)#16  | 80.94(4)   | F(1)#9-K(1)/Cs(1)-F(3)    | 42.71(11)  |
| F(3)#15-K(2)-F(2)    | 80.94(4)   | F(1)#8-K(1)/Cs(1)-F(3)    | 125.32(11) |
| F(3)#15-K(2)-F(2)#16 | 80.94(4)   | F(1)#9-K(1)/Cs(1)-F(3)#5  | 125.32(11) |
| F(3)#5-K(2)-F(1)#11  | 137.77(17) | F(1)#8-K(1)/Cs(1)-F(3)#4  | 137.29(11) |
| F(3)#15-K(2)-F(1)#11 | 64.74(15)  | F(1)#10-K(1)/Cs(1)-F(3)#1 | 125.32(11) |
| F(3)#5-K(2)-F(1)#10  | 64.74(15)  | F(1)#9-K(1)/Cs(1)-F(3)#2  | 54.68(11)  |
| F(3)#15-K(2)-F(1)#10 | 137.77(17) | F(1)#9-K(1)/Cs(1)-F(3)#1  | 54.68(11)  |
| F(2)#16-K(2)-F(3)#13 | 122.26(8)  | F(1)#10-K(1)/Cs(1)-F(3)#2 | 125.32(11) |
| F(2)-K(2)-F(3)#14    | 76.03(7)   | F(1)#8-K(1)/Cs(1)-F(3)#3  | 54.68(11)  |
| F(2)-K(2)-F(3)#13    | 76.03(7)   | F(1)#7-K(1)/Cs(1)-F(3)#2  | 137.29(11) |
| F(2)#16-K(2)-F(3)#10 | 76.03(7)   | F(1)#10-K(1)/Cs(1)-F(3)#5 | 54.68(11)  |
| F(2)-K(2)-F(3)#10    | 122.26(8)  | F(1)#9-K(1)/Cs(1)-F(3)#4  | 125.32(11) |
| F(2)#16-K(2)-F(3)#14 | 122.26(8)  | F(1)#8-K(1)/Cs(1)-F(3)#5  | 137.29(11) |
| F(2)-K(2)-F(3)#12    | 122.26(8)  | F(1)#10-K(1)/Cs(1)-F(3)#4 | 54.68(11)  |

|                       |           |                           |            |
|-----------------------|-----------|---------------------------|------------|
| F(2)#16-K(2)-F(3)#12  | 76.03(7)  | F(1)#7-K(1)/Cs(1)-F(3)#1  | 137.29(11) |
| F(2)-K(2)-F(2)#16     | 157.41(8) | F(1)#7-K(1)/Cs(1)-F(3)#4  | 42.71(11)  |
| F(2)#16-K(2)-F(1)#10  | 92.19(2)  | F(1)#10-K(1)/Cs(1)-F(3)#3 | 42.71(11)  |
| F(2)#16-K(2)-F(1)#11  | 92.19(2)  | F(1)#8-K(1)/Cs(1)-F(3)#1  | 42.71(11)  |
| F(2)-K(2)-F(1)#11     | 92.19(2)  | F(1)#8-K(1)/Cs(1)-F(3)#2  | 42.71(11)  |
| F(2)-K(2)-F(1)#10     | 92.19(2)  | F(1)#9-K(1)/Cs(1)-F(3)#3  | 137.29(11) |
| F(3)#9-Si(1)-F(3)     | 180       | F(1)#7-K(1)/Cs(1)-F(1)#8  | 180        |
| F(3)#21-Si(1)-F(3)    | 88.1(3)   | F(1)#9-K(1)/Cs(1)-F(1)#8  | 90         |
| F(3)#20-Si(1)-F(3)    | 91.9(3)   | F(1)#9-K(1)/Cs(1)-F(1)#7  | 90         |
| F(3)#20-Si(1)-F(3)#9  | 88.1(3)   | F(1)#10-K(1)/Cs(1)-F(1)#7 | 90         |
| F(3)#20-Si(1)-F(3)#21 | 180       | F(1)#10-K(1)/Cs(1)-F(1)#8 | 90         |
| F(3)#21-Si(1)-F(3)#9  | 91.9(3)   | F(1)#9-K(1)/Cs(1)-F(1)#10 | 180        |
| F(1)-Si(1)-F(3)#9     | 90        | F(1)#10-K(2)-F(3)#10      | 47.86(13)  |
| F(1)-Si(1)-F(3)#20    | 90        | F(1)#10-K(2)-F(3)#14      | 112.31(15) |
| F(1)-Si(1)-F(3)#21    | 90        | F(1)#11-K(2)-F(3)#12      | 47.86(13)  |
| F(1)#9-Si(1)-F(3)#21  | 90        | F(1)#11-K(2)-F(3)#10      | 112.31(15) |
| F(1)#9-Si(1)-F(3)     | 90        | F(1)#11-K(2)-F(3)#14      | 47.86(13)  |
| F(1)-Si(1)-F(3)       | 90        | F(1)#10-K(2)-F(3)#12      | 112.31(15) |
| F(1)#9-Si(1)-F(3)#9   | 90        | F(1)#11-K(2)-F(3)#13      | 112.31(15) |
| F(1)#9-Si(1)-F(1)     | 180       | F(1)#10-K(2)-F(3)#13      | 47.86(13)  |
| F(1)#9-Si(1)-F(3)#20  | 90        | F(1)#10-K(2)-F(1)#11      | 157.5(3)   |

**Table S4.** The compounds in  $M_3SiF_7$  system in ICSD

| Compounds     | Space group   | a     | b     | c     |
|---------------|---------------|-------|-------|-------|
| $K_3SiF_7$    | <i>P4/mbm</i> | 7.725 | 7.725 | 5.555 |
| $Rb_3SiF_7$   | <i>P4/mbm</i> | 7.959 | 7.959 | 5.823 |
| $Cs_3SiF_7$   | <i>P4/mbm</i> | 8.306 | 8.306 | 6.17  |
| $NH_4SiF_7$   | <i>P4/mbm</i> | 8.075 | 8.075 | 5.86  |
| $Rb_2CsSiF_7$ | <i>P4/mbm</i> | 8.099 | 8.099 | 5.899 |
| $KCs_2SiF_7$  | <i>P4/mbm</i> | 8.115 | 8.115 | 5.972 |
| $KRb_2SiF_7$  | <i>P4/mbm</i> | 7.883 | 7.883 | 5.724 |
| $RbCs_2SiF_7$ | <i>P4/mbm</i> | 8.198 | 8.198 | 6.019 |



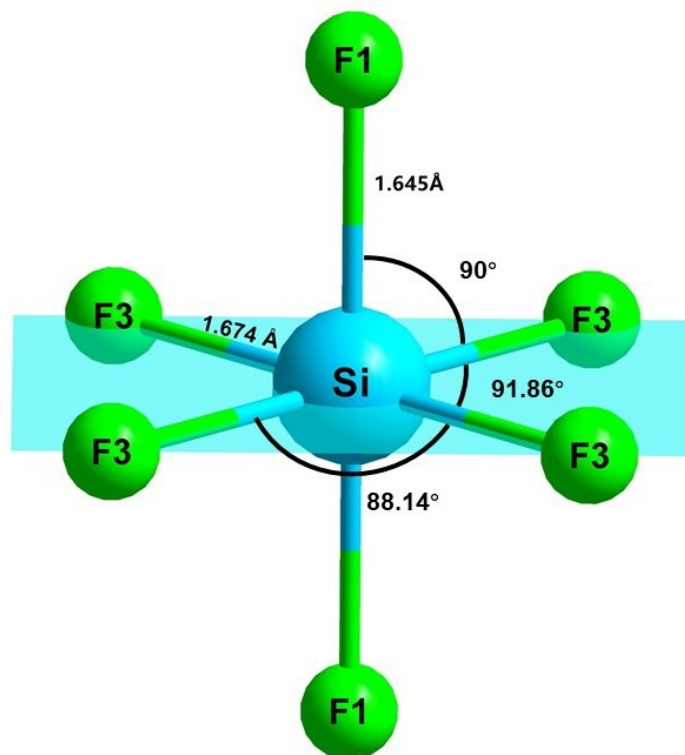

**Fig.S1** The structural information of the  $[\text{SiF}_6]^{2-}$  octahedra.

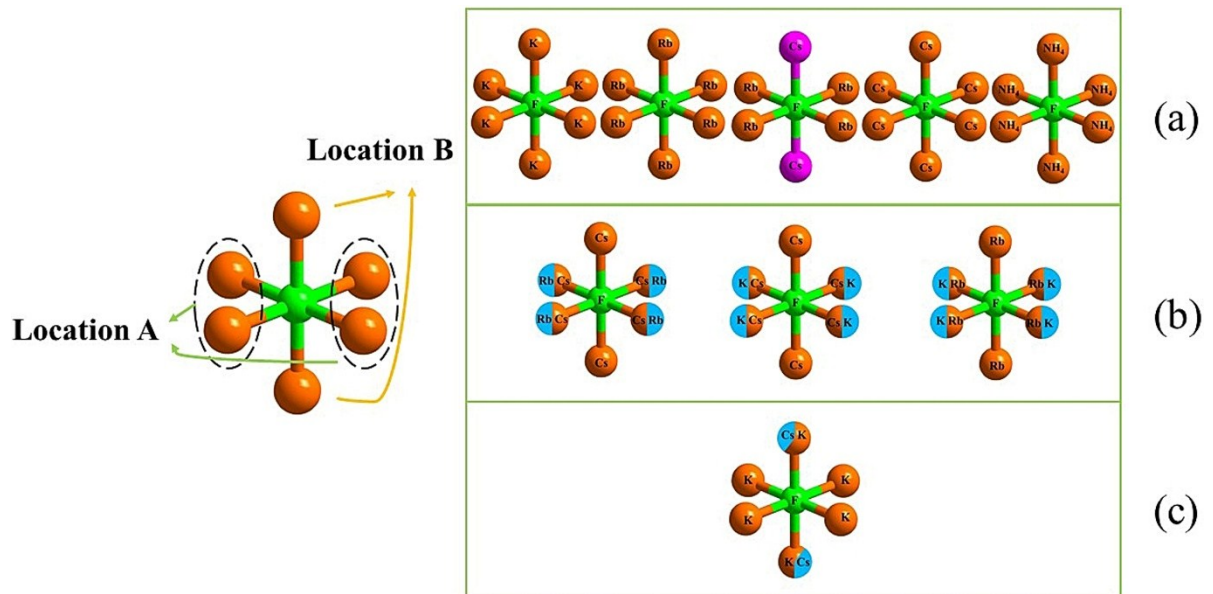

**Fig.S2** The  $\text{FM}_6$  octahedra of  $\text{M}_3\text{SiF}_7$  ( $\text{M} = \text{K}^+, \text{Rb}^+, \text{Cs}^+, \text{NH}_4^+$ ), (a) The  $\text{FM}_6$  octahedra of  $\text{K}_3\text{SiF}_7$ ,  $\text{Rb}_3\text{SiF}_7$ ,  $\text{Rb}_2\text{CsSiF}_7$ ,  $\text{Cs}_3\text{SiF}_7$ , and  $(\text{NH}_4)_3\text{SiF}_7$ ; (b) The  $\text{FM}_6$  octahedra of  $\text{Cs}_2\text{RbSiF}_7$ ,  $\text{Cs}_2\text{KSiF}_7$ , and  $\text{Rb}_2\text{KSiF}_7$ ; (c) The  $\text{FM}_6$  octahedra of  $\text{K}_{2.64}\text{Cs}_{0.36}\text{SiF}_7$ .

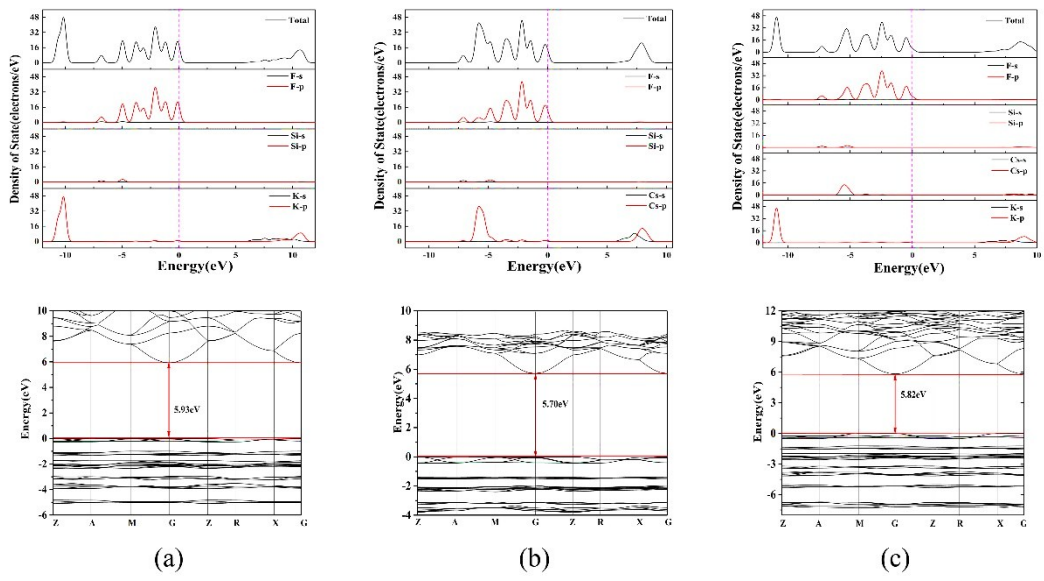

**Fig.S3** Band structure and calculated band gap of (a)  $K_3SiF_7$ ; (2)  $Cs_3SiF_7$ ; (3)  $K_{2.64}Cs_{0.36}SiF_7$ .

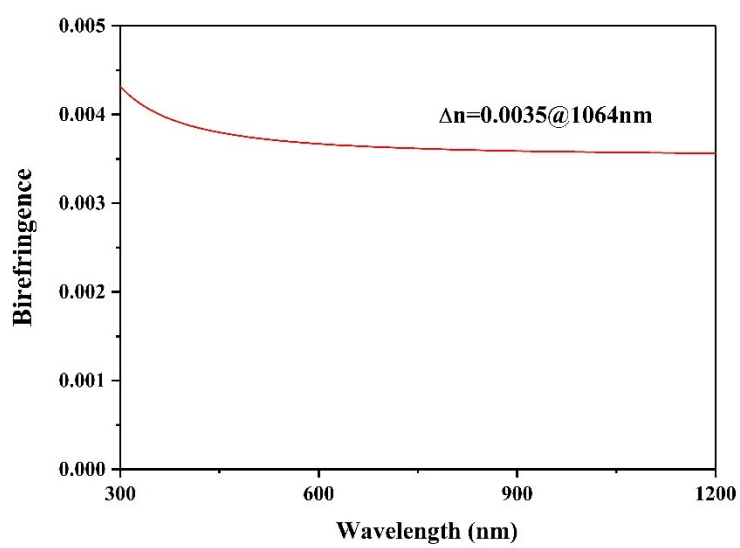

(a)

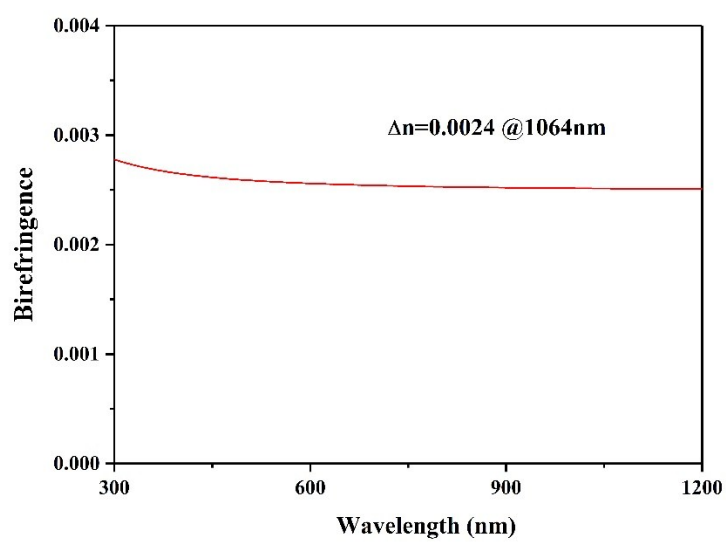

(b)

Fig.S4 Calculated birefringence of (a)  $K_3SiF_7$ ; (b)  $Cs_3SiF_7$ .
